# Supplementary material
Source: HighWire-hosted journal article supplement (http://www.qdcxjkg.com/highwire/filestream/113981/field_highwire_adjunct_files/0/ERJ-00003-2013_Disclosures.pdf)
Supplement: ERJ-00003-2013_Disclosures.pdf [file ERJ-00003-2013_Disclosures.pdf]

**M. Arzt** has received unrestricted grant support from Philips Home Healthcare Solutions (Murrysville, PA, USA), Resmed (Martinsried, Germany) and the German Foundation for Cardiac Research (Deutsche Stiftung für Herzforschung). Michael Arzt is the holder of an endowed professorship from the Free State of Bavaria at the University of Regensburg that was donated by Philips Home Healthcare Solutions (Murrysville, PA, USA) and Resmed (Martinsried, Germany). Michael Arzt has previously received lecture fees from AstraZeneca, Covidien, Philips Home Healthcare Solutions (Murrysville, PA, USA) and Resmed (Martinsried, Germany).
